# Supplementary material for: Sources and long-term variability of carbon monoxide at Mount Kenya and in Nairobi
Source: Copernicus journal article supplement (doi:10.5194/acp-23-14349-2023), 2023-11-20
Supplement: Supplementary file 1 [file acp-23-14349-2023-supplement.pdf]

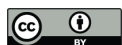

*Supplement of*

## **Sources and long-term variability of carbon monoxide at Mount Kenya and in Nairobi**

**Leonard Kirago et al.**

*Correspondence to:* August Andersson ([august.r.andersson@gmail.com](mailto:august.r.andersson@gmail.com))

The copyright of individual parts of the supplement might differ from the article licence.

20 **Contents**

21 **Supplementary Figures .....3**

22     Figure S1: Temporal and diurnal trends of CO at Mt. Kenya GAW station for August 2021..... 3

23     Figure S2: The CO mole fractions and dual-isotope ( $\delta^{13}\text{C}$  and  $\delta^{18}\text{O}$ ) composition at Mt. Kenya GAW

24     and in Nairobi for the 2021 flask sampling campaign. .... 4

25     Figure S3: 10 days HYSPLIT air masses back trajectories at Mt. Kenya GAW station..... 5

26     Figure S4: Stable isotopes composition of CO for ambient air samples collected on Mt. Kenya in

27     1996/97, at Mt. Kenya GAW station in 2021, and in Nairobi..... 6

28 **Supplementary Tables .....7**

29     Table S1: Sample details and stable isotope composition for 2021 campaign..... 7

30     Table S2: Sample details and stable isotope composition for 2021 campaign..... 8

31     Table S3: Sample details and stable isotope composition for 1996/97 campaigns. .... 9

32

33

34 **Supplementary Figures**

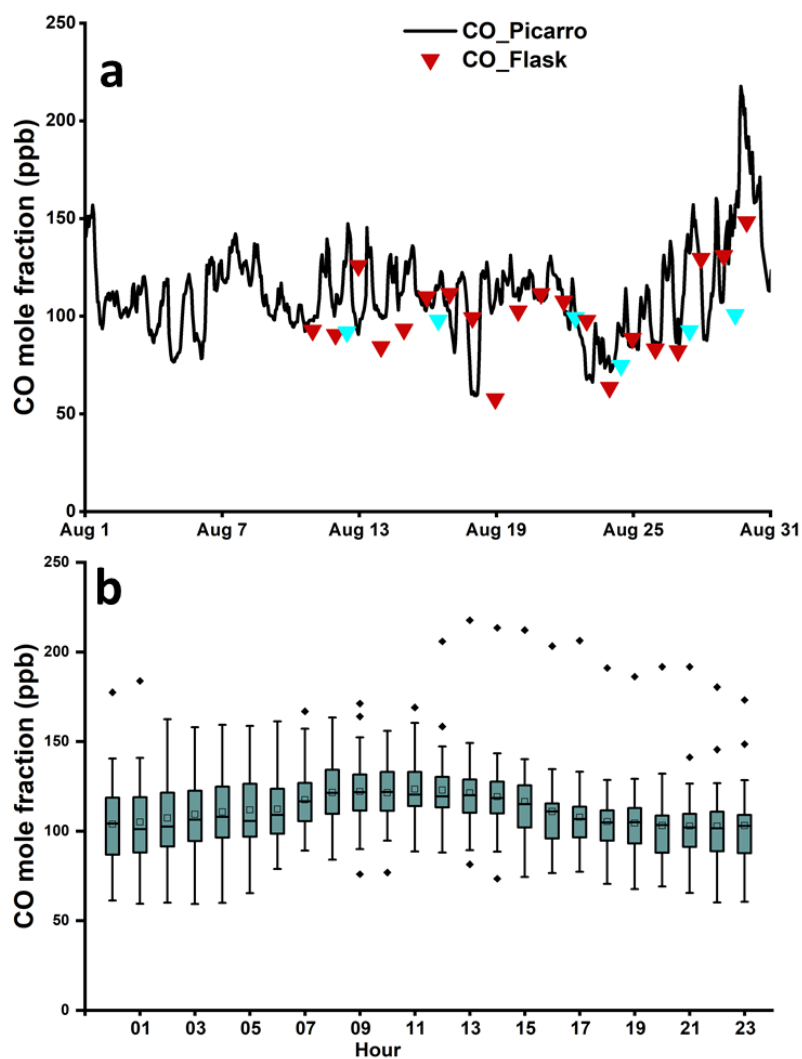

35  
36 **Figure S1: Temporal and diurnal trends of CO at Mt. Kenya GAW station for August 2021. a) Comparison between Picarro**  
37 **G2401 and flask-based CO measurements show good agreement for the study period. B) The diurnal trend of CO**  
38 **characterised by daytime maxima.**

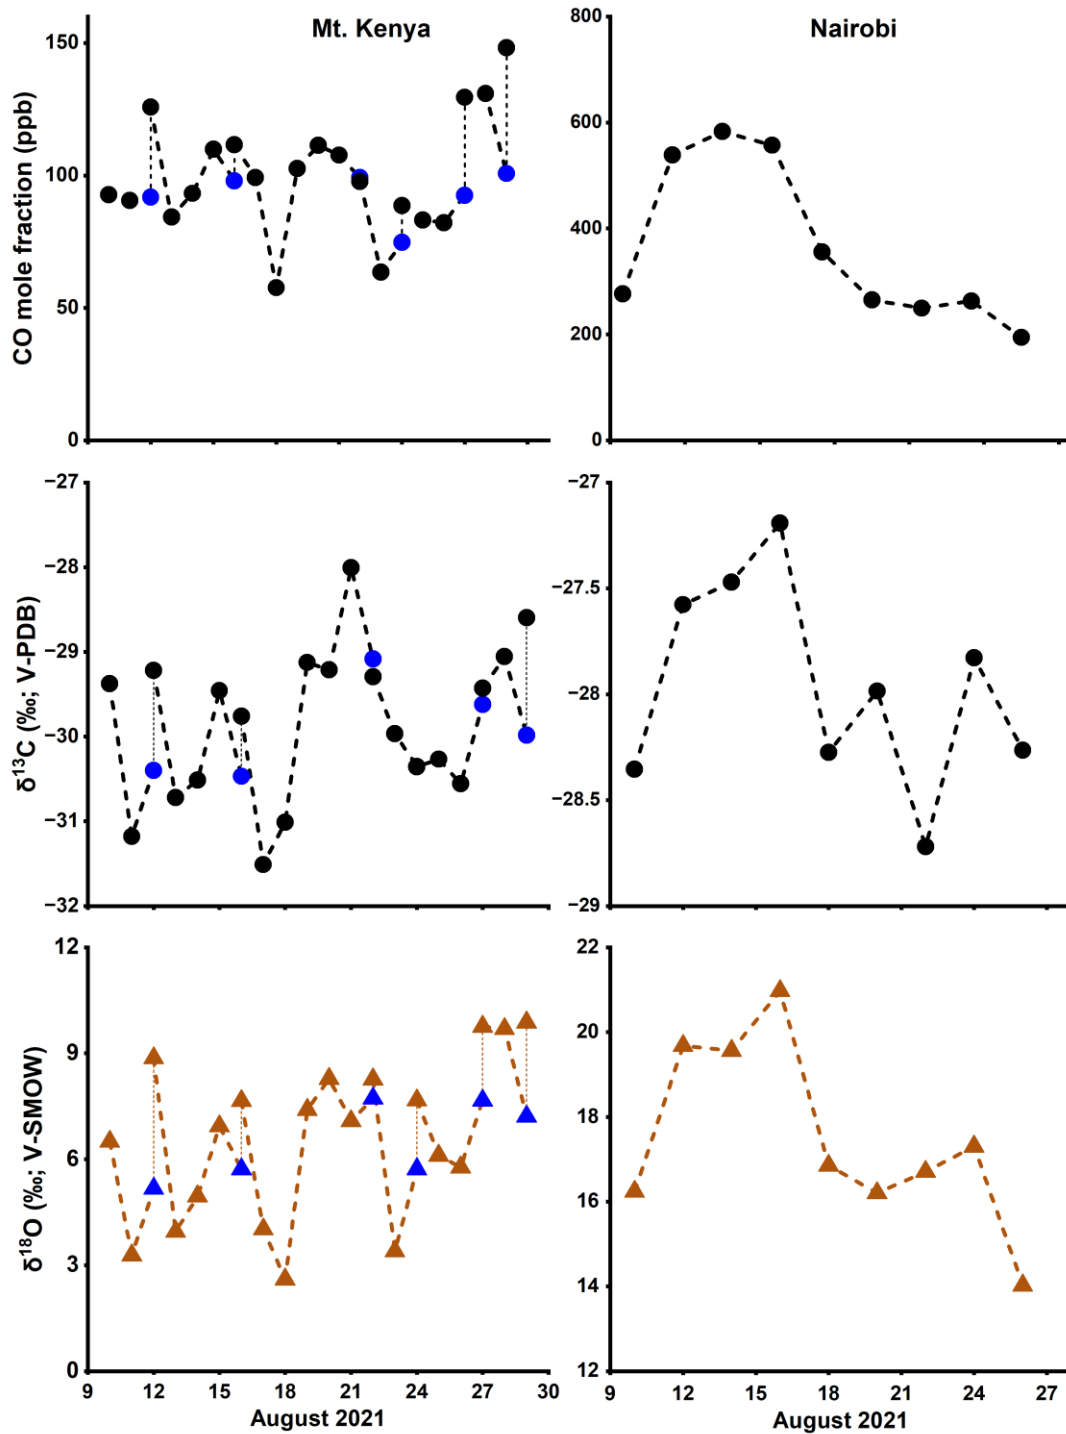

39

40

41

Figure S2: The CO mole fractions and dual-isotope ( $\delta^{13}\text{C}$  and  $\delta^{18}\text{O}$ ) composition at Mt. Kenya GAW and in Nairobi for the 2021 flask sampling campaign.

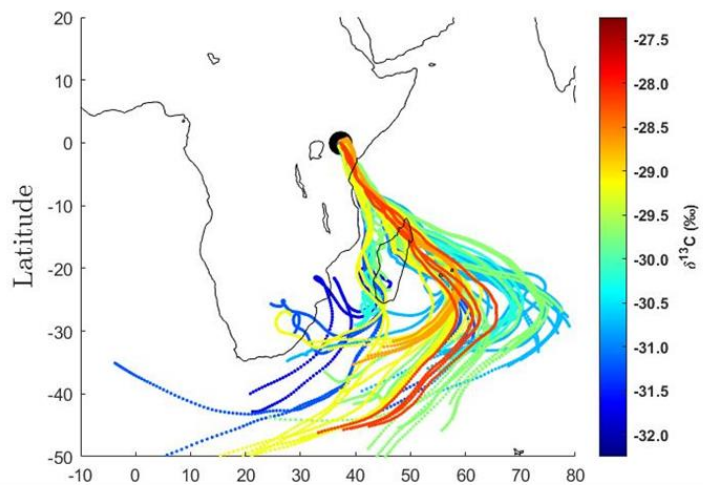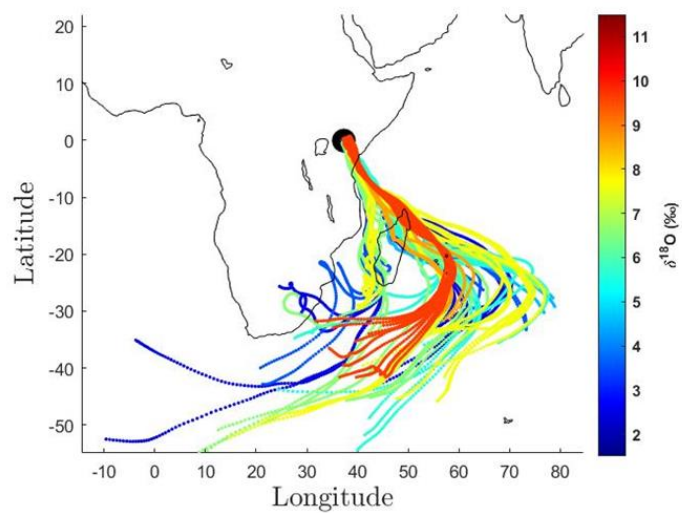

42  
 43 **Figure S3: 10 days HYSPLIT air masses back trajectories at Mt. Kenya GAW station generated every six hours and at an**  
 44 **arrival height of 100 m during the sampling campaign (10-30<sup>th</sup> August 2021). The back trajectories are colour-coded to**  
 45 **their respective isotopic signatures (delta 13C on the top, delta 18O on the bottom panel).**

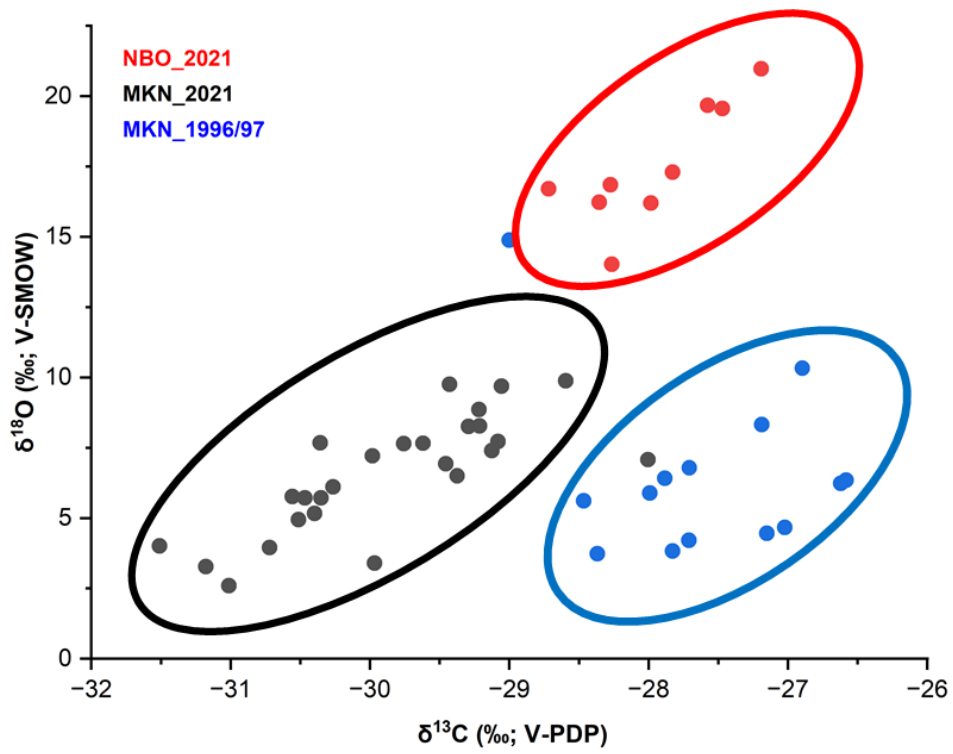

46

47 Figure S4: Stable isotopes composition of CO for ambient air samples collected on Mt. Kenya in 1996/97 (blue), at Mt.  
 48 Kenya GAW in 2021 (black), and in Nairobi (red).

49 **Supplementary Tables**

50 **Table S1: Sample details and stable isotope composition for 2021 campaign. Ambient air samples were collected at Mt.**  
 51 **Kenya GAW station.**

| <b>Date</b> | <b>Sampling Time</b> | <b>CO (ppb)</b> | <b><math>\delta^{13}\text{C}</math> (‰ V-PDB)</b> | <b><math>\delta^{18}\text{O}</math> (‰ V-SMOW)</b> |
|-------------|----------------------|-----------------|---------------------------------------------------|----------------------------------------------------|
| 2021-08-10  | Night-time           | 93              | -29.4                                             | 6.5                                                |
| 2021-08-11  | Night-time           | 91              | -31.2                                             | 3.3                                                |
| 2021-08-12  | Night-time           | 126             | -29.2                                             | 8.9                                                |
| 2021-08-13  | Night-time           | 84              | -30.7                                             | 4.0                                                |
| 2021-08-14  | Night-time           | 93              | -30.5                                             | 5.0                                                |
| 2021-08-15  | Night-time           | 110             | -29.5                                             | 6.9                                                |
| 2021-08-16  | Night-time           | 112             | -29.8                                             | 7.7                                                |
| 2021-08-17  | Night-time           | 99              | -31.5                                             | 4.0                                                |
| 2021-08-18  | Night-time           | 58              | -31.0                                             | 2.6                                                |
| 2021-08-19  | Night-time           | 103             | -29.1                                             | 7.4                                                |
| 2021-08-20  | Night-time           | 111             | -29.2                                             | 8.3                                                |
| 2021-08-21  | Night-time           | 108             | -28.0                                             | 7.1                                                |
| 2021-08-22  | Night-time           | 98              | -29.3                                             | 8.3                                                |
| 2021-08-23  | Night-time           | 64              | -30.0                                             | 3.4                                                |
| 2021-08-24  | Night-time           | 89              | -30.4                                             | 7.7                                                |
| 2021-08-25  | Night-time           | 83              | -30.3                                             | 6.1                                                |
| 2021-08-26  | Night-time           | 82              | -30.6                                             | 5.8                                                |
| 2021-08-27  | Night-time           | 130             | -29.4                                             | 9.8                                                |
| 2021-08-28  | Night-time           | 131             | -29.1                                             | 9.7                                                |
| 2021-08-29  | Night-time           | 148             | -28.6                                             | 9.9                                                |
| 2021-08-12  | Day time             | 92              | -30.4                                             | 5.2                                                |
| 2021-08-16  | Day time             | 98              | -30.5                                             | 5.7                                                |
| 2021-08-22  | Day time             | 99              | -29.1                                             | 7.7                                                |
| 2021-08-24  | Day time             | 75              | -30.4                                             | 5.7                                                |
| 2021-08-27  | Day time             | 93              | -29.6                                             | 7.7                                                |
| 2021-08-29  | Day time             | 101             | -30.0                                             | 7.2                                                |

52

53 **Table S2: Sample details and stable isotope composition for 2021 campaign. Ambient air samples were collected in Nairobi.**

| <b>Date</b> | <b>Sampling Time</b> | <b>CO (ppb)</b> | <b><math>\delta^{13}\text{C}</math> (‰ V-PDB)</b> | <b><math>\delta^{18}\text{O}</math> (‰ V-SMOW)</b> |
|-------------|----------------------|-----------------|---------------------------------------------------|----------------------------------------------------|
| 2021-08-10  | Day time             | 277             | -28.4                                             | 16.2                                               |
| 2021-08-12  | Day time             | 539             | -27.6                                             | 19.7                                               |
| 2021-08-14  | Day time             | 583             | -27.5                                             | 19.6                                               |
| 2021-08-16  | Day time             | 557             | -27.2                                             | 21.0                                               |
| 2021-08-18  | Day time             | 356             | -28.3                                             | 16.9                                               |
| 2021-08-20  | Day time             | 265             | -28.0                                             | 16.2                                               |
| 2021-08-22  | Day time             | 250             | -28.7                                             | 16.7                                               |
| 2021-08-24  | Day time             | 263             | -27.8                                             | 17.3                                               |
| 2021-08-26  | Day time             | 194             | -28.3                                             | 14.0                                               |

54



55 **Table S3: Sample details and stable isotope composition for 1996/97 campaigns. Ambient air samples were collected on Mt.**  
 56 **Kenya.**

| <b>Date</b> | <b>Duration</b> | <b>CO<br/>(ppb)</b> | <b><math>\delta^{13}\text{C}</math><br/>(V-PDB)</b> | <b><math>\delta^{18}\text{O}</math><br/>(V-SMOW)</b> |
|-------------|-----------------|---------------------|-----------------------------------------------------|------------------------------------------------------|
| 1996-07-29  | Day time        | 157.0               | -27.71                                              | 6.79                                                 |
| 1996-07-30  | Day time        | 197.2               | -26.90                                              | 10.33                                                |
| 1996-07-31  | Day time        | 169.6               | -27.19                                              | 8.33                                                 |
| 1996-08-01  | Day time        | 365.1               | -29.00                                              | 14.88                                                |
| 1996-08-20  | Day time        | 140.9               | -27.99                                              | 5.89                                                 |
| 1996-08-20  | Day time        | 135.4               | -27.88                                              | 6.42                                                 |
| 1996-09-25  | Day time        | 193.5               | -26.62                                              | 6.23                                                 |
| 1996-09-25  | Day time        | 200.1               | -26.58                                              | 6.35                                                 |
| 1997-01-10  | Day time        | 121.4               | -27.71                                              | 4.22                                                 |
| 1997-01-10  | Day time        | 120.1               | -27.83                                              | 3.83                                                 |
| 1997-02-06  | Day time        | 144.4               | -27.02                                              | 4.67                                                 |
| 1997-02-06  | Day time        | 139.2               | -27.15                                              | 4.46                                                 |
| 1997-09-10  | Day time        | 123.70              | -28.37                                              | 3.74                                                 |
| 1997-09-10  | Day time        | 135.40              | -28.47                                              | 5.61                                                 |

57
